# Supplementary material for: Serum amino acid profiles and risk of type 2 diabetes among Japanese adults in the Hitachi Health Study
Source: PubMed Central journal article supplement (PMC6504928; doi:10.1038/s41598-019-43431-z), 2019-05-07
Supplement: 41598_2019_43431_MOESM1_ESM.pdf [file 41598_2019_43431_MOESM1_ESM.pdf]

## Supplementary information

### **Serum amino acid profiles and risk of type 2 diabetes among Japanese adults in the Hitachi Health Study**

Sanmei Chen<sup>1,\*</sup>, Shamima Akter<sup>1</sup>, Keisuke Kuwahara<sup>1,3</sup>, Yumi Matsushita<sup>2</sup>, Tohru Nakagawa<sup>4</sup>, Maki Konishi<sup>1</sup>, Toru Honda<sup>4</sup>, Shuichiro Yamamoto<sup>4</sup>, Takeshi Hayashi<sup>4</sup>, Mitsuhiko Noda<sup>5</sup>, Tetsuya Mizoue<sup>1</sup>

<sup>1</sup>Department of Epidemiology and Prevention, Center for Clinical Sciences, National Center for Global Health and Medicine, Tokyo, Japan

<sup>2</sup>Department of Clinical Research, Center for Clinical Sciences, National Center for Global Health and Medicine, Tokyo, Japan

<sup>3</sup>Teikyo University Graduate School of Public Health, Tokyo, Japan

<sup>4</sup>Hitachi Health Care Center, Hitachi, Ltd., Ibaraki, Japan

<sup>5</sup>Department of Endocrinology and Diabetes, Saitama Medical University, Saitama, Japan

\*Corresponding author: Sanmei Chen, Department of Epidemiology and Prevention, Center for Clinical Sciences, National Center for Global Health and Medicine, Toyama 1-21-1, Shinjuku Ward, Tokyo 162-8655, Japan. Tel: +81-3-3202-7181, Fax: +81-3-3202-7364, E-mail: sanmei.chen@kyudai.jp

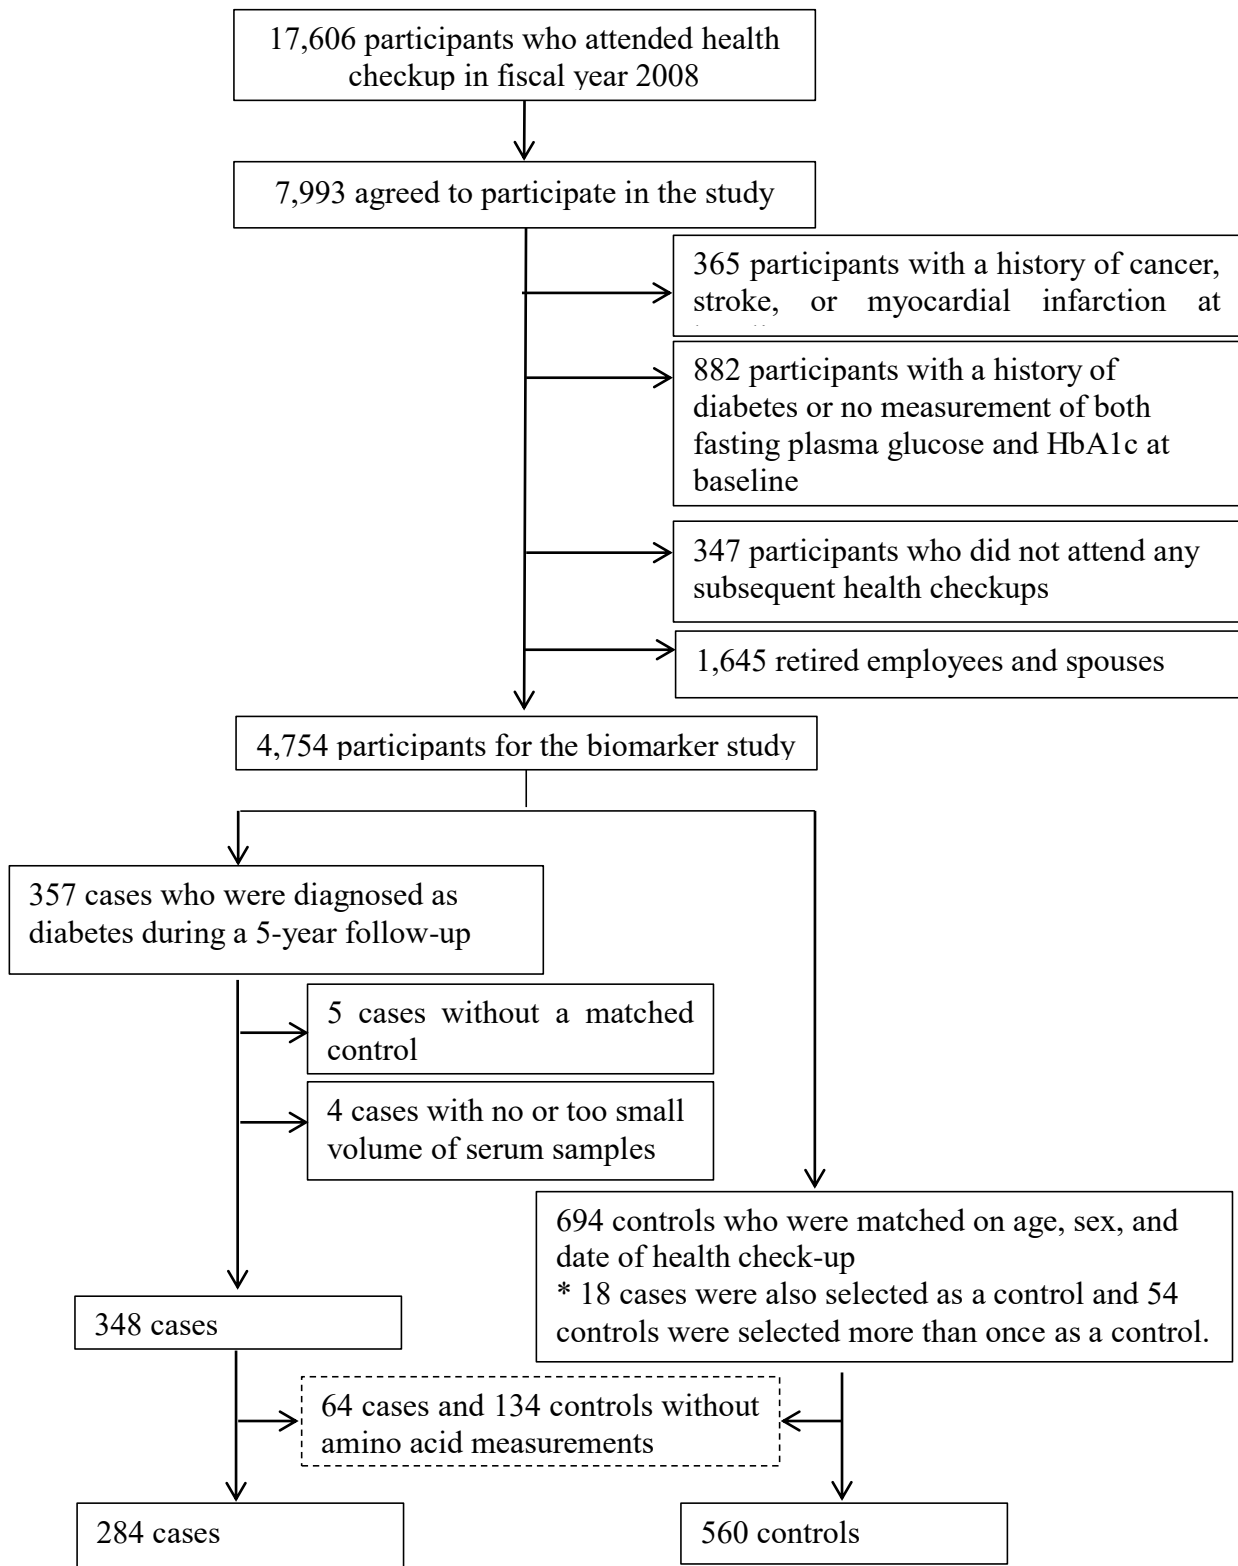

**Supplemental Figure S1.** Flow diagram of study sample

**Supplementary Table S1.** Associations of intermediary organic acid concentrations with type 2 diabetes risk in the Hitachi Health Study

|                                | Quartiles (range) <sup>a</sup><br>( $\mu\text{mol/L}$ ) | No. of<br>ca./co. | Model 1<br>OR (95% CI) | Model 2<br>OR (95% CI) | Model 3<br>OR (95% CI) |
|--------------------------------|---------------------------------------------------------|-------------------|------------------------|------------------------|------------------------|
| $\alpha$ -amino-n-butyric acid | 1 (< 16.2)                                              | 58/136            | 1.00                   | 1.00                   | 1.00                   |
|                                | 2 (16.2 -< 20.4)                                        | 80/147            | 1.27 (0.84-1.92)       | 1.31 (0.84-2.05)       | 1.39 (0.86-2.25)       |
|                                | 3 (20.4 -< 24.8)                                        | 69/144            | 1.12 (0.73-1.71)       | 0.99 (0.62-1.57)       | 0.88 (0.54-1.45)       |
|                                | 4 ( $\geq$ 24.8)                                        | 77/133            | 1.34 (0.88-2.05)       | 1.04 (0.65-1.66)       | 1.03 (0.63-1.71)       |
|                                | P-trend <sup>b</sup>                                    |                   | 0.26                   | 0.77                   | 0.63                   |
| Hydroxyproline                 | 1 (< 7.6)                                               | 61/143            | 1.00                   | 1.00                   | 1.00                   |
|                                | 2 (7.6 -< 9.5)                                          | 75/141            | 1.27 (0.83-1.92)       | 1.27 (0.81-1.98)       | 1.24 (0.77-2.00)       |
|                                | 3 (9.5 -< 12.1)                                         | 80/135            | 1.40 (0.93-2.12)       | 1.22 (0.78-1.92)       | 1.03 (0.64-1.67)       |
|                                | 4 ( $\geq$ 12.1)                                        | 68/141            | 1.17 (0.76-1.80)       | 1.13 (0.71-1.80)       | 1.01 (0.61-1.66)       |
|                                | P-trend <sup>b</sup>                                    |                   | 0.57                   | 0.80                   | 0.70                   |
| 3-methyl-histidine             | 1 (< 6.6)                                               | 69/150            | 1.00                   | 1.00                   | 1.00                   |
|                                | 2 (6.6 -< 7.45)                                         | 60/130            | 1.00 (0.66-1.53)       | 0.97 (0.61-1.53)       | 0.93 (0.57-1.52)       |
|                                | 3 (7.45 -< 8.7)                                         | 80/149            | 1.17 (0.79-1.74)       | 1.22 (0.80-1.87)       | 1.19 (0.76-1.88)       |
|                                | 4 ( $\geq$ 8.7)                                         | 75/131            | 1.25 (0.83-1.88)       | 1.06 (0.68-1.64)       | 0.97 (0.60-1.55)       |
|                                | P-trend <sup>b</sup>                                    |                   | 0.22                   | 0.64                   | 0.92                   |
| Taurine                        | 1 (< 84.8)                                              | 82/140            | 1.00                   | 1.00                   | 1.00                   |
|                                | 2 (84.8 -< 95.6)                                        | 61/140            | 0.75 (0.50-1.12)       | 0.75 (0.48-1.16)       | 0.72 (0.45-1.15)       |
|                                | 3 (95.6 -< 107.8)                                       | 61/140            | 0.74 (0.49-1.12)       | 0.80 (0.51-1.22)       | 0.83 (0.52-1.32)       |
|                                | 4 ( $\geq$ 107.8)                                       | 80/140            | 0.98 (0.66-1.45)       | 0.95 (0.62-1.45)       | 0.87 (0.56-1.36)       |
|                                | P-trend <sup>b</sup>                                    |                   | 0.99                   | 0.91                   | 0.70                   |
| Monoethanolamine               | 1 (< 14.6)                                              | 66/136            | 1.00                   | 1.00                   | 1.00                   |
|                                | 2 (14.6 -< 16.1)                                        | 61/133            | 0.95 (0.62-1.45)       | 0.88 (0.55-1.40)       | 0.77 (0.47-1.25)       |
|                                | 3 (16.1 -< 18.3)                                        | 74/151            | 1.01 (0.67-1.51)       | 0.94 (0.61-1.46)       | 1.04 (0.65-1.65)       |
|                                | 4 ( $\geq$ 18.3)                                        | 83/140            | 1.21 (0.81-1.82)       | 1.08 (0.69-1.68)       | 1.04 (0.65-1.67)       |
|                                | P-trend <sup>b</sup>                                    |                   | 0.27                   | 0.59                   | 0.59                   |

Abbreviations: OR, odds ratio; CI, confidential interval; BMI, body mass index; HOMA-IR, homeostasis model assessment of insulin resistance.

Model 1 was adjusted for the following matching factors: age (years), sex, and month of health examination (April-June, July-Sep, Oct-Dec, or Jan-March). Model 2 was based on model 1, additionally adjusted for leisure time physical activity (< 150 minutes/week or  $\geq$  150 minutes/week), occupational physical activity (sedentary or active), smoking (never smoker, former smoker, or current smoker consuming < 20 or  $\geq$  20 cigarettes/day), alcohol consumption (non-drinker, or alcohol consuming < 23, 23 to < 46, or  $\geq$  46 g ethanol/day), shift work (yes or no), sleep duration (< 6, 6 to < 7, or  $\geq$  7 hours/day), family history of diabetes (yes or no), and hypertension (yes or no), and BMI. Model 3 was further adjusted for HOMA-IR.

<sup>a</sup> Quartiles were based on the distribution of serum concentrations among controls.

<sup>b</sup> All linear trend tests over quartiles were conducted by replacing the ordinal values with the median concentration within each quartile.
